# Supplementary material
Source: MDPI journal article supplement (https://www.mdpi.com/2073-4395/9/8/435)
Supplement: s1 [file s1]

Table S4

Cis-Element Prediction of *BnAUX/LAX* and *BnPIN* Promoters

|                   |                  |                                                                      | BnPIN1a | BnPIN1b | BnPIN3 | BnPIN5 | BnPIN6 | BnPIN8 | BnAUX1 | BnLAX1 | BnLAX2 | BnLAX3 |
|-------------------|------------------|----------------------------------------------------------------------|---------|---------|--------|--------|--------|--------|--------|--------|--------|--------|
| Hormones          | TGA-element      | auxin-responsive element                                             | 1       |         |        |        |        |        |        |        |        |        |
|                   | TATC-box         | cis-acting element involved in gibberellin-responsiveness            |         |         |        |        |        |        |        | 1      |        | 1      |
|                   | TCA-element      | cis-acting element involved in salicylic acid responsiveness         |         |         | 2      |        | 3      |        |        |        |        |        |
|                   | CGTCA-motif      | cis-acting regulatory element involved in the MeJA-responsiveness    |         |         | 2      |        |        | 2      |        | 1      |        |        |
|                   | TGACG-motif      | cis-acting regulatory element involved in the MeJA-responsiveness    |         | 1       |        | 1      |        | 1      |        | 1      |        |        |
|                   | P-box            | gibberellin-responsive element                                       |         | 1       |        |        | 1      |        |        |        |        | 1      |
|                   | GARE-motif       | gibberellin-responsive element                                       |         |         |        |        |        |        |        |        |        | 1      |
| Stresses          | TC-rich repeats  | cis-acting element involved in defense and stress responsiveness     |         |         |        |        |        |        |        | 1      |        |        |
|                   | LTR              | cis-acting element involved in low-temperature responsiveness        |         |         | 1      |        | 1      | 1      |        |        |        |        |
|                   | ABRE             | cis-acting element involved in the abscisic acid responsiveness      | 1       | 3       |        | 1      |        |        | 1      | 2      |        | 1      |
|                   | ARE              | cis-acting regulatory element essential for the anaerobic induction  | 3       |         |        | 2      | 1      | 2      |        | 1      | 2      |        |
|                   | MBS              | MYB binding site involved in drought-inducibility                    |         |         |        |        |        |        |        | 1      |        |        |
| Light             | ACE              | cis-acting element involved in light responsiveness                  |         |         |        |        |        | 1      |        |        | 1      |        |
|                   | G-box            | cis-acting regulatory element involved in light responsiveness       |         | 4       | 1      | 1      | 1      | 1      | 1      | 3      |        |        |
|                   | GT1-motif        | light responsive element                                             |         |         | 4      | 1      |        |        |        |        | 1      |        |
|                   | MRE              | MYB binding site involved in light responsiveness                    |         | 1       |        |        |        |        |        |        | 1      | 1      |
|                   | Box 4            | part of a conserved DNA module involved in light responsiveness      |         |         |        |        | 1      | 2      |        | 1      |        | 2      |
|                   | ATCT-motif       | part of a conserved DNA module involved in light responsiveness      |         | 1       |        |        |        |        |        |        |        | 1      |
|                   | ATC-motif        | part of a conserved DNA module involved in light responsiveness      |         | 1       |        |        |        |        |        |        |        |        |
|                   | TCT-motif        | part of a light responsive element                                   |         |         |        |        | 1      |        | 1      |        |        | 1      |
|                   | chs-CMA1a        | part of a light responsive element                                   |         |         |        |        |        |        |        |        | 1      |        |
|                   | Gap-box          | part of a light responsive element                                   |         |         |        |        |        |        |        |        |        | 1      |
|                   | TCCC-motif       | part of a light responsive element                                   | 1       |         |        |        |        |        |        |        |        |        |
|                   | GATA-motif       | part of a light responsive element                                   |         | 1       |        |        | 2      |        |        |        |        |        |
|                   | I-box            | part of a light responsive element                                   |         |         | 2      | 1      |        |        |        |        |        |        |
|                   | AT1-motif        | part of a light responsive module                                    |         |         |        |        |        | 1      |        |        |        | 1      |
| Circadian         | AE-box           | part of a module for light response                                  |         | 1       | 1      | 1      |        |        |        |        |        |        |
|                   | circadian        | cis-acting regulatory element involved in circadian control          | 1       |         |        |        |        |        |        |        |        |        |
| Essential Element | CAAT-box         | common cis-acting element in promoter and enhancer regions           | 6       | 10      | 6      | 10     | 7      | 7      | 2      | 2      | 10     | 10     |
|                   | TATA-box         | core promoter element around -30 of transcription start              | 7       | 36      | 11     | 61     | 25     | 20     | 4      | 24     | 13     | 17     |
| Others            | AT-rich element  | binding site of AT-rich DNA binding protein (ATBP-1)                 | 1       |         |        |        |        |        |        |        |        |        |
|                   | A-box            | cis-acting regulatory element                                        |         |         |        |        |        |        |        | 1      |        |        |
|                   | RY-element       | cis-acting regulatory element involved in seed-specific regulation   |         |         |        |        |        | 1      |        |        |        |        |
|                   | O2-site          | cis-acting regulatory element involved in zein metabolism regulation |         |         |        | 1      |        |        |        |        |        |        |
|                   | CAT-box          | cis-acting regulatory element related to meristem expression         |         |         |        |        |        |        |        | 1      |        |        |
|                   | GCN4_motif       | cis-regulatory element involved in endosperm expression              | 1       |         |        |        |        |        |        |        |        |        |
|                   | AT-rich sequence | element for maximal elicitor-mediated activation (2copies)           |         | 1       |        |        |        |        |        |        |        |        |
|                   | MRE              | MYB binding site involved in light responsiveness                    |         |         |        |        |        | 1      |        |        |        |        |
