# Supplementary material
Source: MDPI journal article supplement (https://www.mdpi.com/2073-4395/9/8/435)
Supplement: s1 [file s1]

Table S2 Primers for qRT-PCR analysis

| Gene           | Forward Primer          | Reverse Primer          |
|----------------|-------------------------|-------------------------|
| <i>BnAUX1</i>  | CTCAACCACTCTAACGCCTTTTC | GTCATGCATCCCTATCACCTTCT |
| <i>BnLAX1</i>  | GTGTTTCTTCTAACTCTTCGCCG | CTTGTACACTCAAAACCCGCATT |
| <i>BnLAX2</i>  | CCCCAAAGAAACCAAAACCTCAA | AACCAAGCGTCATAAACAGAACC |
| <i>BnLAX3</i>  | ACTGTGTTCGTACCTTCATTCCA | GCATGCATAATCTCCACTGTCAC |
| <i>BnPIN1a</i> | GCAGCCTGAACTATAGCAATGTG | GCCATTCTATCTGATGCTGGTCT |
| <i>BnPIN1b</i> | CGGAGAGAGAACAACCAAGATGA | GAAGCAAACAAGGGACCAAATGA |
| <i>BnPIN3</i>  | AGAACTGGGGAGGGAGATAATCA | ATATGTGTTGGGGTTTCGGATGA |
| <i>BnPIN5</i>  | ATACTCTTGTGGTTGTTGGTGGT | ATTTCTAAGTGCCACCTGTTTGC |
| <i>BnPIN6</i>  | TCTCACGCAATCCAAACACTTAC | ATCCGAGGTTGAAGTGCCATAAA |
| <i>BnPIN8</i>  | GCCACAGATGAGATAGAGAACCC | TTTATGCAAGCCCAAATGAGACC |
