# Supplementary material
Source: MDPI journal article supplement (https://www.mdpi.com/2073-4395/9/8/435)
Supplement: s1 [file s1]

**Table S1**      **Gene sequence of *BnAUX/LAX* and *BnPIN* from three databases**

| Gene    | Unigene identified from three databases |                       |                       | CDS      | Overlapped length (bp) | Nt(bp) |
|---------|-----------------------------------------|-----------------------|-----------------------|----------|------------------------|--------|
|         | Unigene in database 1                   | Unigene in database 2 | Unigene in database 3 |          |                        |        |
| BnAUX1  | comp73250_c0_seq1_13                    | isotig16915_11        | comp37202_c2          | complete | 303                    | 2085   |
| BnLAX1  | comp79867_c0_seq1_19                    |                       | comp36230_c0          | complete | 1476                   | 2382   |
| BnLAX2  | comp42966_c0_seq1_4                     | isotig10489_27        | comp23939_c3          | complete | 399                    | 1372   |
| BnLAX3  | comp80335_c0_seq1_12                    | isotig08362_29        | comp34113_c0          | complete | 1434                   | 2056   |
| BnPIN1a | comp83950_c0_seq6_13                    | isotig15502_14        | comp34724_c1          | complete | 377                    | 2834   |
| BnPIN1b | comp68591_c0_seq1_8                     | isotig03564_15        | comp30428_c1          | complete | 1073                   | 1989   |
| BnPIN3  | comp70614_c1_seq1_20                    | isotig02866_40        |                       | complete | 1098                   | 2034   |
| BnPIN5  | comp77115_c0_seq1_24                    | HS0W81S01AT2F6_4      | comp29067_c0          | complete | 523                    | 1316   |
| BnPIN6  | comp806281_c0_seq1_1                    | isotig12682_22        | comp34988_c1          | complete | 221                    | 2002   |
| BnPIN8  | comp77104_c0_seq2_19                    | HS0W81S01BN1I2_9      | comp26996_c0          | complete | 597                    | 1287   |
