# Supplementary material
Source: MDPI journal article supplement (https://www.mdpi.com/2073-4395/9/8/435)
Supplement: s1 [file s1]

Table S3

## Primers for subcellular localization

| Gene          | Forward Primer                                | Reverse Primer                               |
|---------------|-----------------------------------------------|----------------------------------------------|
| <i>BnAUX1</i> | GGGCTCGAGAAGCTTGGATCCATGTTGGCGCAGAAACAAGC     | CGAGATCAGTTATCTAGGATCCTTAATGATGAGGTGGTGCGA   |
| <i>BnLAX1</i> | GGGCTCGAGAAGCTTGGATCCATGCCAGGGCCGAAGCAAAT     | CGAGATCAGTTATCTAGGATCCTTAGTGACGCGCTGACGG     |
| <i>BnLAX2</i> | GGGCTCGAGAAGCTTGGATCCATGGCTTCATCAGATAAGGTTG   | CGAGATCAGTTATCTAGGATCCTCAATGACCATGGGGGCG     |
| <i>BnPIN5</i> | GGGCTCGAGAAGCTTGGATCCATGATAGGTTGGCAAGACGTTTAC | CGAGATCAGTTATCTAGGATCCTCAATGTAAAAAATCCAAGAGA |
